# Supplementary material for: Systematic review and meta-analysis of the epidemiology of Lassa virus in humans, rodents and other mammals in sub-Saharan Africa
Source: PLOS journal article supplement (doi:10.1371/journal.pntd.0008589), 2020-08-26
Supplement: S4 (10.1371/journal.pntd.0008589.s004) [file journal.pntd.0008589.s004]

S4 Table: Main reasons of exclusion of eligible studies

| N° | Author. Year       | Title                                                                                                                                                      | Reason of exclusion                              |
|----|--------------------|------------------------------------------------------------------------------------------------------------------------------------------------------------|--------------------------------------------------|
| 1  | Abdulraheem. 2012  | Public health importance of lassa fever epidemiology. clinical features and current management review of literature                                        | Review                                           |
| 2  | Adogo. 2020        | Yellow fever in Nigeria: a review of the current situation                                                                                                 | Review                                           |
| 3  | Adomeh. 2012       | The Sensitivity and Specificity of Lassa Virus IgM by ELISA as Screening Tool at Early Phase of Lassa Fever Infection.                                     | Sample with already known result                 |
| 4  | Aiko Fukuma. 2012  | Rapid detection of Lassa virus by reverse transcription-loop-mediated isothermal amplification.                                                            | No data on LASV prevalence or case fatality rate |
| 5  | Ajayi. 2013        | Containing a Lassa fever epidemic in a resource-limited setting: outbreak description and lessons learned from Abakaliki. Nigeria (January-March 2012).    | No data on LASV prevalence or case fatality rate |
| 6  | Akhiwu. 2018       | Lassa fever outbreak in adolescents in North Central Nigeria: report of cases.                                                                             | Case report                                      |
| 7  | Akpede. 2019       | Acute Abdomen in Pediatric Patients With Lassa Fever: Prevalence and Response to Nonoperative Management.                                                  | No data on LASV prevalence or case fatality rate |
| 8  | Akpede. 2019       | Caseload and Case Fatality of Lassa Fever in Nigeria. 2001-2018: A Specialist Center's Experience and Its Implications.                                    | Review                                           |
| 9  | Akpede. 2018       | Lassa fever outbreaks in Nigeria.                                                                                                                          | Case report                                      |
| 10 | Azeez-Akande. 2016 | A REVIEW OF LASSA FEVER. AN EMERGING OLD WORLD HAEMORRHAGIC VIRAL DISEASE IN SUB-SAHARAN AFRICA                                                            | Review                                           |
| 11 | Bausch. 2000       | Diagnosis and clinical virology of Lassa fever as evaluated by enzyme-linked immunosorbent assay. indirect fluorescent-antibody test. and virus isolation. | Study with serial samples from the same patient  |
| 12 | Bergmann. 1982     | New African viral fevers Ebola. Lassa and Marburg.                                                                                                         | Review                                           |
| 13 | Bloch. 1978        | A serological survey of Lassa fever in Liberia.                                                                                                            | Duplicate study                                  |
| 14 | Boiro. 1987        | Experimental studies of haemorrhagic fever in Guinea (Clinical. epidemiological and serological investigations).                                           | Duplicate study                                  |
| 15 | Boisen. 2016       | Field Validation of the ReEBOV Antigen Rapid Test for Point-of-Care Diagnosis of Ebola Virus Infection.                                                    | No data on LASV prevalence or case fatality rate |

|    |                  |                                                                                                                                                                                                                                   |                                                  |
|----|------------------|-----------------------------------------------------------------------------------------------------------------------------------------------------------------------------------------------------------------------------------|--------------------------------------------------|
| 16 | Boisen. 2015     | Multiple circulating infections can mimic the early stages of viral hemorrhagic fevers and possible human exposure to filoviruses in sierra leone prior to the 2014 outbreak.                                                     | No data on LASV prevalence or case fatality rate |
| 17 | Bonney. 2018     | Molecular detection of dengue virus in patients suspected of Ebola virus disease in Ghana.                                                                                                                                        | No data on LASV prevalence or case fatality rate |
| 18 | Bonney . 2016    | Molecular confirmation of Lassa fever imported into Ghana.                                                                                                                                                                        | Sample size < or = 10 participants               |
| 19 | Borremans . 2011 | Presence of Mopeia virus. an African arenavirus. related to biotope and individual rodent host characteristics: implications for virus transmission.                                                                              | No data on LASV prevalence or case fatality rate |
| 20 | Bowen . 2000     | Genetic diversity among Lassa virus strains.                                                                                                                                                                                      | No data on LASV prevalence or case fatality rate |
| 21 | Chare. 2003      | Phylogenetic analysis reveals a low rate of homologous recombination in negative-sense RNA viruses.                                                                                                                               | No data on LASV prevalence or case fatality rate |
| 22 | Cummins. 1989    | Electrocardiographic abnormalities in patients with Lassa fever.                                                                                                                                                                  | No data on LASV prevalence or case fatality rate |
| 23 | Cummins. 1989    | A plasma inhibitor of platelet aggregation in patients with Lassa fever.                                                                                                                                                          | No data on LASV prevalence or case fatality rate |
| 24 | Dedkov. 2019     | Development and Evaluation of a One-Step Quantitative RT-PCR Assay for Detection of Lassa Virus.                                                                                                                                  | Sample with already known result                 |
| 25 | Dongo. 2013      | Lassa fever presenting as acute abdomen: a case series.                                                                                                                                                                           | Case report                                      |
| 26 | Drosten. 2002    | Rapid detection and quantification of RNA of Ebola and Marburg viruses. Lassa virus. Crimean-Congo hemorrhagic fever virus. Rift Valley fever virus. dengue virus. and yellow fever virus by real-time reverse transcription-PCR. | Report                                           |
| 27 | Duvignaud. 2019  | Delayed-onset paraparesis in Lassa fever: A case report.                                                                                                                                                                          | Case report                                      |
| 28 | Dyer. 2019       | Lassa outbreak: WHO warns of unusually rapid spread in Nigeria.                                                                                                                                                                   | Review                                           |
| 29 | Dzotsi. 2012     | The first cases of Lassa fever in Ghana.                                                                                                                                                                                          | Case report                                      |
| 30 | Ehichioya. 2019  | Phylogeography of Lassa Virus in Nigeria.                                                                                                                                                                                         | No data on LASV prevalence or case fatality rate |
| 31 | Ehichioya . 2011 | Current molecular epidemiology of Lassa virus in Nigeria.                                                                                                                                                                         | No data on LASV prevalence or case fatality rate |
| 32 | Ehichioya . 2010 | Lassa fever. Nigeria. 2005-2008.                                                                                                                                                                                                  | Report                                           |

|    |                     |                                                                                                                        |                                                                       |
|----|---------------------|------------------------------------------------------------------------------------------------------------------------|-----------------------------------------------------------------------|
| 33 | Eze. 2014           | Acute abdominal pain in patients with lassa fever: Radiological assessment and diagnostic challenges.                  | Review                                                                |
| 34 | Eze. 2010           | High Lassa Fever activity in Northern part of Edo State. Nigeria: reanalysis of confirmatory test results              | Duplicate study                                                       |
| 35 | Fatiregun. 2019     | Lassa fever awareness and knowledge among community residents in Ondo State. Nigeria                                   | No data on LASV prevalence or case fatality rate                      |
| 36 | Fichet-Calvet. 2016 | Spatial and temporal evolution of Lassa virus in the natural host population in Upper Guinea.                          | No data on LASV prevalence or case fatality rate                      |
| 37 | Fichet-Calvet. 2013 | Lassa Fever: A rodent-human interaction.                                                                               | Report                                                                |
| 38 | Fichet-Calvet. 2008 | Reproductive characteristics of <i>Mastomys natalensis</i> and Lassa virus prevalence in Guinea. West Africa.          | No data on LASV prevalence or case fatality rate                      |
| 39 | Fichet-calvet. 2005 | Spatial distribution of commensal rodents in regions with high and low Lassa fever prevalence in Guinea.               | No data on LASV prevalence or case fatality rate                      |
| 40 | Frame. 1984         | The use of Lassa fever convalescent plasma in Nigeria.                                                                 | No data on LASV prevalence or case fatality rate                      |
| 41 | Frame. 1975         | Surveillance of Lassa fever in missionaries stationed in West Africa.                                                  | Study with serial samples from the same patient                       |
| 42 | Fraser. 1974        | Lassa fever in the Eastern Province of Sierra Leone. 1970-1972. I. Epidemiologic studies.                              | Not possible to extract data on LASV prevalence or case fatality rate |
| 43 | FYUMAGWA. 2011      | Response to Rift Valley Fever in Tanzania: Challenges and Opportunities                                                | Review                                                                |
| 44 | Grundy. 1980        | Isolated case of Lassa fever in Zaria. Northern Nigeria.                                                               | Case report                                                           |
| 45 | Günther. 2001       | Antibodies to Lassa virus Z protein and nucleoprotein co-occur in human sera from Lassa fever endemic regions.         | No data on LASV prevalence or case fatality rate                      |
| 46 | Ibekwe. 2012        | The sensitivity and specificity of Lassa virus IgM by ELISA as screening tool at early phase of Lassa fever infection. | Sample with already known result                                      |
| 47 | Ibekwe. 2010        | Early-onset sensorineural hearing loss in Lassa fever.                                                                 | No data on LASV prevalence or case fatality rate                      |
| 48 | Ilori. 2019         | Increase in Lassa Fever Cases in Nigeria. January-March 2018.                                                          | No data on LASV prevalence or case fatality rate                      |
| 49 | Ilori. 2019         | Epidemiologic and Clinical Features of Lassa Fever Outbreak in Nigeria. January 1-May 6. 2018.                         | Duplicate study                                                       |
| 50 | Iroezindu. 2015     | Lessons learnt from the management of a case of Lassa fever and follow-up of nosocomial primary contacts in            | Case report                                                           |

|    |                        |                                                                                                                                               |                                                                       |
|----|------------------------|-----------------------------------------------------------------------------------------------------------------------------------------------|-----------------------------------------------------------------------|
|    |                        | Nigeria during Ebola virus disease outbreak in West Africa.                                                                                   |                                                                       |
| 51 | Ishak. 1982            | Viral hemorrhagic fevers with hepatic involvement: pathologic aspects with clinical correlations.                                             | Review                                                                |
| 52 | Jones. 2000            | Lassa fever imported to England.                                                                                                              | Case report                                                           |
| 53 | Kafetzopoulou. 2019    | Metagenomic sequencing at the epicenter of the Nigeria 2018 Lassa fever outbreak.                                                             | No data on LASV prevalence or case fatality rate                      |
| 54 | Keita . 2019           | Investigation of a cross-border case of Lassa fever in West Africa.                                                                           | Case report                                                           |
| 55 | Knobloch. 1980         | Clinical observations in 42 patients with lassa fever.                                                                                        | No full text                                                          |
| 56 | Koehler. 2018          | A highly multiplexed broad pathogen detection assay for infectious disease diagnostics.                                                       | No data on LASV prevalence or case fatality rate                      |
| 57 | Manning. 2015          | Lassa virus isolates from Mali and the Ivory Coast represent an emerging fifth lineage.                                                       | No data on LASV prevalence or case fatality rate                      |
| 58 | Martin Gabriel. 2018   | Development and evaluation of antibody-capture immunoassays for detection of Lassa virus nucleoprotein-specific immunoglobulin M and G.       | Sample with already known result                                      |
| 59 | Mateo. 2019            | Fatal Case of Lassa Fever. Bangolo District. Côte d'Ivoire. 2015.                                                                             | Case report                                                           |
| 60 | Maxmen. 2018           | Deadly Lassa-fever outbreak tests Nigeria's revamped health agency.                                                                           | Report                                                                |
| 61 | Mertens. 1973          | Clinical presentation of Lassa fever cases during the hospital epidemic at Zorzor. Liberia. March-April 1972.                                 | Case report                                                           |
| 62 | Monath. 1974           | Lassa fever in the Eastern Province of Sierra Leone. 1970-1972. II. Clinical observations and virological studies on selected hospital cases. | No data on LASV prevalence or case fatality rate                      |
| 63 | Monson. 1987           | Pediatric Lassa fever: a review of 33 Liberian cases.                                                                                         | Not possible to extract data on LASV prevalence or case fatality rate |
| 64 | Monson. 1984           | Endemic Lassa fever in Liberia. I. Clinical and epidemiological aspects at Curran Lutheran Hospital. Zorzor. Liberia.                         | No data on LASV prevalence or case fatality rate                      |
| 65 | Niklasson. 1984        | Detection of Lassa virus antigens and Lassa virus-specific immunoglobulins G and M by enzyme-linked immunosorbent assay.                      | No data on LASV prevalence or case fatality rate                      |
| 66 | No author listed. 2014 | After the “blood diamond” conflict: lassa fever in Sierra Leone.                                                                              | Comment on an article                                                 |

|    |                         |                                                                                                                                                |                                                                       |
|----|-------------------------|------------------------------------------------------------------------------------------------------------------------------------------------|-----------------------------------------------------------------------|
| 67 | No author listed. 2000  | Large Ebola haemorrhagic fever outbreak in Uganda.                                                                                             | No full text                                                          |
| 68 | No author listed. 1974  | Rodent control and lassa fever.                                                                                                                | Review                                                                |
| 69 | No authors listed. 2000 | Lassa fever. imported case. Netherlands.                                                                                                       | Case report                                                           |
| 70 | Okuno. 1976             | Failure to prove arenavirus infection among the small mammals from an endemic area of Korean hemorrhagic nephrosonephritis.                    | Data outside of sub Saharan Africa                                    |
| 71 | Olowookere. 2014        | Diagnostic proficiency and reporting of Lassa fever by physicians in Osun State of Nigeria.                                                    | No data on LASV prevalence or case fatality rate                      |
| 72 | Olschläger. 2010        | Improved detection of Lassa virus by reverse transcription-PCR targeting the 5' region of S RNA.                                               | No data on LASV prevalence or case fatality rate                      |
| 73 | Olugasa. 2015           | Mapping of Lassa fever cases in post-conflict Liberia. 2008-2012: a descriptive and categorical analysis of age, gender and seasonal pattern.  | Report                                                                |
| 74 | Onyedibe. 2018          | A cross sectional study of dengue virus infection in febrile patients presumptively diagnosed of malaria in Maiduguri and Jos plateau, Nigeria | No data on LASV prevalence or case fatality rate                      |
| 75 | Richards. 2015          | Viral haemorrhagic fevers in South Africa                                                                                                      | Review                                                                |
| 76 | Roberts. 2018           | Nigeria hit by unprecedented Lassa fever outbreak.                                                                                             | Report                                                                |
| 77 | Roth. 2015              | Factors associated with mortality in febrile patients in a government referral hospital in the Kenema district of Sierra Leone.                | No data on LASV prevalence or case fatality rate                      |
| 78 | Safronetz. 2017         | Annual Incidence of Lassa Virus Infection in Southern Mali.                                                                                    | Sample with already known result                                      |
| 79 | Salu. 2016              | Biosafety level-2 laboratory diagnosis of Zaire Ebola virus disease imported from Liberia to Nigeria.                                          | Case report                                                           |
| 80 | Satterly. 2017          | Comparison of MagPix assays and enzyme-linked immunosorbent assay for detection of hemorrhagic fever viruses.                                  | No data on LASV prevalence or case fatality rate                      |
| 81 | Sebba. 2018             | A point-of-care diagnostic for differentiating Ebola from endemic febrile diseases.                                                            | No data on LASV prevalence or case fatality rate                      |
| 82 | Shaffer. 2019           | Data set on Lassa fever in post-conflict Sierra Leone.                                                                                         | Duplicate study                                                       |
| 83 | Shaffer. 2014           | Lassa Fever in Post-Conflict Sierra Leone.                                                                                                     | Duplicate study                                                       |
| 84 | Siddle. 2018            | Genomic Analysis of Lassa Virus during an Increase in Cases in Nigeria in 2018.                                                                | Not possible to extract data on LASV prevalence or case fatality rate |

|    |                                 |                                                                                                                               |                                                                       |
|----|---------------------------------|-------------------------------------------------------------------------------------------------------------------------------|-----------------------------------------------------------------------|
| 85 | Singh. 2013                     | Arenavirus and West Nile virus in solid organ transplantation.                                                                | Review                                                                |
| 86 | Stremlau. 2015                  | Discovery of novel rhabdoviruses in the blood of healthy individuals from West Africa.                                        | No data on LASV prevalence or case fatality rate                      |
| 87 | Tambo. 2018                     | Re-emerging Lassa fever outbreaks in Nigeria: Re-enforcing                                                                    | Not possible to extract data on LASV prevalence or case fatality rate |
| 88 | Ter Meulen. 2001                | Short communication: Lassa fever in Sierra Leone: UN peacekeepers are at risk.                                                | No data on LASV prevalence or case fatality rate                      |
| 89 | Trappier. 1993                  | Evaluation of the polymerase chain reaction for diagnosis of Lassa virus infection.                                           | Study with serial samples from the same patient                       |
| 90 | Usifoh. 2019                    | Lassa Fever-associated Stigmatization among Staff and Students of the University of Benin. Nigeria.                           | No data on LASV prevalence or case fatality rate                      |
| 91 | Usifoh. 2018                    | Impact of Lassa Fever on the Practice and Consumption of Stored Food by University of Benin Community. in Benin City. Nigeria | No data on LASV prevalence or case fatality rate                      |
| 92 | Vieth. 2007                     | RT-PCR assay for detection of Lassa virus and related Old World arenaviruses targeting the L gene.                            | No data on LASV prevalence or case fatality rate                      |
| 93 | White. 1972                     | Lassa fever A study of 23 hospital cases.                                                                                     | Not possible to extract data on LASV prevalence or case fatality rate |
| 94 | Whitmer. 2016                   | New Lineage of Lassa Virus. Togo. 2016.                                                                                       | No data on LASV prevalence or case fatality rate                      |
| 95 | Wolff. 2019                     | Lassa virus circulating in Liberia: a retrospective genomic characterisation.                                                 | No data on LASV prevalence or case fatality rate                      |
| 96 | Wolff. 2016                     | Genome sequence of Lassa virus isolated from the first domestically acquired case in Germany.                                 | Data outside of sub Saharan Africa                                    |
| 97 | World Health Organization. 2005 | Update on Lassa fever in West Africa.                                                                                         | Report                                                                |

## Reference

1. *Rodent control and lassa fever.* Lancet, 1974. **2**(7881): p. 632.
2. *Large Ebola haemorrhagic fever outbreak in Uganda.* New Zealand Public Health Report, 2000. **7**(11-12): p. 58.
3. *Lassa fever, imported case, Netherlands.* Releve epidemiologique hebdomadaire, 2000. **75**(33): p. 265-265.

4. *Lassa fever imported to England*. Communicable disease report. CDR weekly, 2000. **10**(11): p. 99.
5. *After the "blood diamond" conflict: lassa fever in Sierra Leone*. Clinical infectious diseases : an official publication of the Infectious Diseases Society of America, 2014. **59**(12): p. iii-iv.
6. Abdulraheem, I.S., *Public health importance of lassa fever epidemiology, clinical features and current management review of literature*. African Journal of Clinical and Experimental Microbiology, 2002. **3**(1): p. 33-37.
7. Adogo, L.Y. and M.O. Ogoh, *Review Article: Yellow fever in Nigeria: A review of the current situation*. African Journal of Clinical and Experimental Microbiology, 2020. **21**(1): p. 1-13.
8. Adomeh, D.I., et al., *The Sensitivity and Specificity of Lassa Virus IgM by ELISA as Screening Tool at Early Phase of Lassa Fever Infection*. Nigerian Medical Journal, 2012.
9. Ajayi, N.A., et al., *Containing a Lassa fever epidemic in a resource-limited setting: outbreak description and lessons learned from Abakaliki, Nigeria (January-March 2012)*. International journal of infectious diseases : IJID : official publication of the International Society for Infectious Diseases, 2013. **17**(11): p. e1011-e1016.
10. Akhiwu, H.O., et al., *Lassa fever outbreak in adolescents in North Central Nigeria: report of cases*. Journal of virus eradication, 2018. **4**(4): p. 225-227.
11. Akpede, G.O., et al., *Acute Abdomen in Pediatric Patients With Lassa Fever: Prevalence and Response to Nonoperative Management*. Journal of the Pediatric Infectious Diseases Society, 2019. **8**(6): p. 519-524.
12. Akpede, G.O., et al., *Caseload and Case Fatality of Lassa Fever in Nigeria, 2001-2018: A Specialist Center's Experience and Its Implications*. Frontiers in public health, 2019. **7**: p. 170-170.
13. Akpede, G.O., et al., *Lassa fever outbreaks in Nigeria*. Expert review of anti-infective therapy, 2018. **16**(9): p. 663-666.
14. Bausch, D.G., et al., *Diagnosis and clinical virology of Lassa fever as evaluated by enzyme-linked immunosorbent assay, indirect fluorescent-antibody test, and virus isolation*. Journal of clinical microbiology, 2000. **38**(7): p. 2670-2677.
15. Bergmann, J.F., *New African viral fevers Ebola, Lassa and Marburg*. Revue de Medecine, 1982. **23**(35): p. 1859-1864.
16. Bloch, A., *A serological survey of Lassa fever in Liberia*. Bulletin of the World Health Organization, 1978. **56**(5): p. 811-813.
17. Boiro, I., et al., *Experimental studies of haemorrhagic fever in Guinea (Clinical, epidemiological and serological investigations)*. Bulletin de la Societe de Pathologie Exotique et de ses Filiales, 1987. **80**(4): p. 607-612.
18. Boisen, M.L., et al., *Field validation of recombinant antigen immunoassays for diagnosis of Lassa fever*. Scientific reports, 2018. **8**(1): p. 5939-5939.
19. Boisen, M.L., et al., *Multiple circulating infections can mimic the early stages of viral hemorrhagic fevers and possible human exposure to filoviruses in sierra leone prior to the 2014 outbreak*. Viral Immunology, 2015. **28**(1): p. 19-31.
20. Bonney, J.H.K., et al., *Molecular detection of dengue virus in patients suspected of Ebola virus disease in Ghana*. PloS one, 2018. **13**(12): p. e0208907-e0208907.
21. Bonney, J.H.K., et al., *Molecular confirmation of Lassa fever imported into Ghana*. African journal of laboratory medicine, 2016. **5**(1): p. 288-288.
22. Borremans, B., et al., *Presence of Mopeia virus, an African arenavirus, related to biotope and individual rodent host characteristics: implications for virus transmission*. Vector borne and zoonotic diseases (Larchmont, N.Y.), 2011. **11**(8): p. 1125-1131.
23. Bowen, M.D., et al., *Genetic diversity among Lassa virus strains*. Journal of virology, 2000. **74**(15): p. 6992-7004.
24. Chare, E.R., E.A. Gould, and E.C. Holmes, *Phylogenetic analysis reveals a low rate of homologous recombination in negative-sense RNA viruses*. Journal of General Virology, 2003. **84**(10): p. 2691-2703.

25. Cummins, D., et al., *Electrocardiographic abnormalities in patients with Lassa fever*. The Journal of tropical medicine and hygiene, 1989. **92**(5): p. 350-355.
26. Cummins, D., et al., *A plasma inhibitor of platelet aggregation in patients with Lassa fever*. British journal of haematology, 1989. **72**(4): p. 543-548.
27. Dedkov, V.G., et al., *Development and Evaluation of a One-Step Quantitative RT-PCR Assay for Detection of Lassa Virus*. Journal of virological methods, 2019. **271**: p. 113674-113674.
28. Dongo, A.E., et al., *Lassa fever presenting as acute abdomen: a case series*. Virology journal, 2013. **10**: p. 123-123.
29. Drosten, C., et al., *Rapid detection and quantification of RNA of Ebola and Marburg viruses, Lassa virus, Crimean-Congo hemorrhagic fever virus, Rift Valley fever virus, dengue virus, and yellow fever virus by real-time reverse transcription-PCR*. Journal of clinical microbiology, 2002. **40**(7): p. 2323-2330.
30. Duvignaud, A., et al., *Delayed-onset paraparesis in Lassa fever: A case report*. International journal of infectious diseases : IJID : official publication of the International Society for Infectious Diseases, 2019: p. S1201-9712(19)30495-3.
31. Dyer, O., *Lassa outbreak: WHO warns of unusually rapid spread in Nigeria*. BMJ (Clinical research ed.), 2019. **364**: p. l781-l781.
32. Dzotsi, E.K., et al., *The first cases of Lassa fever in Ghana*. Ghana medical journal, 2012. **46**(3): p. 166-170.
33. Ehichioya, D.U., et al., *Phylogeography of Lassa Virus in Nigeria*. Journal of virology, 2019. **93**(21): p. e00929-19.
34. Ehichioya, D.U., et al., *Current molecular epidemiology of Lassa virus in Nigeria*. Journal of clinical microbiology, 2011. **49**(3): p. 1157-1161.
35. Ehichioya, D.U., et al., *Lassa fever, Nigeria, 2005-2008*. Emerging infectious diseases, 2010. **16**(6): p. 1040-1041.
36. Eze, K.C., T.A. Salami, and J.U. Kpolugbo, *Acute abdominal pain in patients with lassa fever: Radiological assessment and diagnostic challenges*. Nigerian medical journal : journal of the Nigeria Medical Association, 2014. **55**(3): p. 195-200.
37. Eze, K.C., et al., *High Lassa Fever activity in Northern part of Edo State, Nigeria: reanalysis of confirmatory test results*. African Journal of Health Sciences, 2010. **17**(3&4): p. 52-56.
38. Fatiregun, A.A., et al., *Lassa fever awareness and knowledge among community residents in Ondo State, Nigeria*. Journal of Community Medicine and Primary Health Care, 2019. **31**(2): p. 26-35.
39. Fichet-Calvet, E., *Lassa Fever: A rodent-human interaction*, in *The Role of Animals in Emerging Viral Diseases*. 2013. p. 89-123.
40. Fichet-Calvet, E., et al., *Spatial distribution of commensal rodents in regions with high and low Lassa fever prevalence in Guinea*. Belgian Journal of Zoology, 2005. **135**(SUPPL.1): p. 63-67.
41. Fichet-Calvet, E., et al., *Reproductive characteristics of Mastomys natalensis and Lassa virus prevalence in Guinea, West Africa*. Vector borne and zoonotic diseases (Larchmont, N.Y.), 2008. **8**(1): p. 41-48.
42. Fichet-Calvet, E., et al., *Spatial and temporal evolution of Lassa virus in the natural host population in Upper Guinea*. Scientific reports, 2016. **6**: p. 21977-21977.
43. Frame, J.D., *Surveillance of Lassa fever in missionaries stationed in West Africa*. Bulletin of the World Health Organization, 1975. **52**(4-6): p. 593-598.
44. Frame, J.D., et al., *The use of Lassa fever convalescent plasma in Nigeria*. Transactions of the Royal Society of Tropical Medicine and Hygiene, 1984. **78**(3): p. 319-324.
45. Fraser, D.W., et al., *Lassa fever in the Eastern Province of Sierra Leone, 1970-1972. I. Epidemiologic studies*. The American journal of tropical medicine and hygiene, 1974. **23**(6): p. 1131-1139.
46. Fukuma, A., et al., *Rapid detection of Lassa virus by reverse transcription-loop-mediated isothermal amplification*. Microbiology and Immunology, 2011. **55**(1): p. 44-50.



47. Fyumagwa, R.D., et al., *Response to Rift Valley Fever in Tanzania: Challenges and Opportunities*. Tanzania Journal of Health Research, 2011. **13**(5 Suppl 1): p. 332-339.
48. Gabriel, M., et al., *Development and evaluation of antibody-capture immunoassays for detection of Lassa virus nucleoprotein-specific immunoglobulin M and G*. PLoS neglected tropical diseases, 2018. **12**(3): p. e0006361.
49. Grundy, D.J., E.T. Bowen, and G. Lloyd, *Isolated case of Lassa fever in Zaria, Northern Nigeria*. Lancet (London, England), 1980. **2**(8195 pt 1): p. 649-650.
50. Günther, S., et al., *Antibodies to Lassa virus Z protein and nucleoprotein co-occur in human sera from Lassa fever endemic regions*. Medical microbiology and immunology, 2001. **189**(4): p. 225-229.
51. Ibekwe, T.S., et al., *The sensitivity and specificity of Lassa virus IgM by ELISA as screening tool at early phase of Lassa fever infection*. Nigerian medical journal : journal of the Nigeria Medical Association, 2012. **53**(4): p. 196-199.
52. Ibekwe, T.S., et al., *Early-onset sensorineural hearing loss in Lassa fever*. European Archives of Oto-Rhino-Laryngology, 2011. **268**(2): p. 197-201.
53. Illori, E.A., et al., *Increase in Lassa Fever Cases in Nigeria, January-March 2018*. Emerging infectious diseases, 2019. **25**(5): p. 1026-1027.
54. Illori, E.A., et al., *Epidemiologic and Clinical Features of Lassa Fever Outbreak in Nigeria, January 1-May 6, 2018*. Emerging infectious diseases, 2019. **25**(6): p. 1066-1074.
55. Iroezindu, M.O., et al., *Lessons learnt from the management of a case of Lassa fever and follow-up of nosocomial primary contacts in Nigeria during Ebola virus disease outbreak in West Africa*. Tropical Medicine and International Health, 2015. **20**(11): p. 1424-1430.
56. Ishak, K.G., et al., *Viral hemorrhagic fevers with hepatic involvement: pathologic aspects with clinical correlations*. Progress in liver diseases, 1982. **7**: p. 495-515.
57. Kafetzopoulou, L.E., et al., *Metagenomic sequencing at the epicenter of the Nigeria 2018 Lassa fever outbreak*. Science (New York, N.Y.), 2019. **363**(6422): p. 74-77.
58. Keita, M., et al., *Investigation of a cross-border case of Lassa fever in West Africa*. BMC infectious diseases, 2019. **19**(1): p. 606-606.
59. Knobloch, J., et al., *Clinical observations in 42 patients with lassa fever*. Tropenmedizin und Parasitologie, 1980. **31**(4): p. 389-398.
60. Koehler, J.W., C.E. Douglas, and T.D. Minogue, *A highly multiplexed broad pathogen detection assay for infectious disease diagnostics*. PLoS Neglected Tropical Diseases, 2018. **12**(11).
61. Manning, J.T., N. Forrester, and S. Paessler, *Lassa virus isolates from Mali and the Ivory Coast represent an emerging fifth lineage*. Frontiers in microbiology, 2015. **6**: p. 1037-1037.
62. Mateo, M., et al., *Fatal Case of Lassa Fever, Bangolo District, Côte d'Ivoire, 2015*. Emerging infectious diseases, 2019. **25**(9): p. 1753-1756.
63. Maxmen, A., *Deadly Lassa-fever outbreak tests Nigeria's revamped health agency*. Nature, 2018. **555**(7697): p. 421-422.
64. Mertens, P.E., et al., *Clinical presentation of Lassa fever cases during the hospital epidemic at Zorzor, Liberia, March-April 1972*. The American journal of tropical medicine and hygiene, 1973. **22**(6): p. 780-784.
65. Monath, T.P., et al., *Lassa fever in the Eastern Province of Sierra Leone, 1970-1972. II. Clinical observations and virological studies on selected hospital cases*. The American journal of tropical medicine and hygiene, 1974. **23**(6): p. 1140-1149.
66. Monson, M.H., et al., *Pediatric Lassa fever: a review of 33 Liberian cases*. The American journal of tropical medicine and hygiene, 1987. **36**(2): p. 408-415.
67. Monson, M.H., et al., *Endemic Lassa fever in Liberia. I. Clinical and epidemiological aspects at Curran Lutheran Hospital, Zorzor, Liberia*. Transactions of the Royal Society of Tropical Medicine and Hygiene, 1984. **78**(4): p. 549-553.

68. Niklasson, B.S., P.B. Jahrling, and C.J. Peters, *Detection of Lassa virus antigens and Lassa virus-specific immunoglobulins G and M by enzyme-linked immunosorbent assay*. Journal of clinical microbiology, 1984. **20**(2): p. 239-244.
69. Okuno, T., et al., *Failure to Prove Arenavirus Infection Among the Small Mammals from an Endemic Area of Korean Hemorrhagic Nephrosonephritis*. Japanese Journal of Medical Science and Biology, 1976. **29**(4): p. 187-197.
70. Olowookere, S.A., et al., *Diagnostic proficiency and reporting of Lassa fever by physicians in Osun State of Nigeria*. BMC infectious diseases, 2014. **14**: p. 344-344.
71. Olschläger, S., et al., *Improved detection of Lassa virus by reverse transcription-PCR targeting the 5' region of S RNA*. Journal of clinical microbiology, 2010. **48**(6): p. 2009-2013.
72. Olugasa, B.O., et al., *Development of a time-trend model for analyzing and predicting case-pattern of Lassa fever epidemics in Liberia, 2013-2017*. Annals of African medicine, 2015. **14**(2): p. 89-96.
73. Onyedibe, K., et al., *A cross sectional study of dengue virus infection in febrile patients presumptively diagnosed of malaria in Maiduguri and Jos plateau, Nigeria*. Malawi Medical Journal, 2018. **30**(4): p. 276-282.
74. Organization, W.H., *Update on Lassa fever in West Africa = Le point sur la fièvre de Lassa en Afrique de l'Ouest*. Weekly Epidemiological Record = Relevé épidémiologique hebdomadaire, 2005. **80**(10): p. 86-88.
75. Richards, G.A., J. Weyer, and L.H. Blumberg, *Viral haemorrhagic fevers in South Africa*. SAMJ: South African Medical Journal, 2015. **105**(9): p. 748-751.
76. Roberts, L., *Nigeria hit by unprecedented Lassa fever outbreak*. Science (New York, N.Y.), 2018. **359**(6381): p. 1201-1202.
77. Roth, P.J., et al., *Factors associated with mortality in febrile patients in a government referral hospital in the Kenema district of Sierra Leone*. The American Journal of Tropical Medicine and Hygiene, 2015. **92**(1): p. 172-177.
78. Safronetz, D., et al., *Annual Incidence of Lassa Virus Infection in Southern Mali*. The American journal of tropical medicine and hygiene, 2017. **96**(4): p. 944-946.
79. Salu, O.B., et al., *Biosafety level-2 laboratory diagnosis of Zaire Ebola virus disease imported from Liberia to Nigeria*. African Journal of Laboratory Medicine, 2016. **5**(1).
80. Satterly, N.G., et al., *Comparison of MagPix assays and enzyme-linked immunosorbent assay for detection of hemorrhagic fever viruses*. Journal of Clinical Microbiology, 2017. **55**(1): p. 68-78.
81. Sebba, D., et al., *A point-of-care diagnostic for differentiating Ebola from endemic febrile diseases*. Science translational medicine, 2018. **10**(471): p. eaat0944.
82. Shaffer, J.G., et al., *Lassa Fever in Post-Conflict Sierra Leone*. PLoS Neglected Tropical Diseases, 2014. **8**(3).
83. Shaffer, J.G., et al., *Data set on Lassa fever in post-conflict Sierra Leone*. Data in brief, 2019. **23**: p. 103673-103673.
84. Siddle, K.J., et al., *Genomic Analysis of Lassa Virus during an Increase in Cases in Nigeria in 2018*. The New England journal of medicine, 2018. **379**(18): p. 1745-1753.
85. Singh, N., M.E. Levi, and A.I.D.C.o. Practice, *Arenavirus and West Nile virus in solid organ transplantation*. American Journal of Transplantation: Official Journal of the American Society of Transplantation and the American Society of Transplant Surgeons, 2013. **13 Suppl 4**: p. 361-371.
86. Stremlau, M.H., et al., *Discovery of Novel Rhabdoviruses in the Blood of Healthy Individuals from West Africa*. PLoS Neglected Tropical Diseases, 2015. **9**(3).
87. Stremlau, M.H., et al., *Discovery of novel rhabdoviruses in the blood of healthy individuals from West Africa*. PLoS neglected tropical diseases, 2015. **9**(3): p. e0003631.
88. Tambo, E., O.T. Adetunde, and O.A. Olalubi, *Re-emerging Lassa fever outbreaks in Nigeria: Re-enforcing "One Health" community surveillance and emergency response practice*. Infectious diseases of poverty, 2018. **7**(1): p. 37-37.

89. ter Meulen, J., et al., *Short communication: Lassa fever in Sierra Leone: UN peacekeepers are at risk*. Tropical medicine & international health : TM & IH, 2001. **6**(1): p. 83-84.
90. Trappier, S.G., et al., *Evaluation of the polymerase chain reaction for diagnosis of Lassa virus infection*. The American journal of tropical medicine and hygiene, 1993. **49**(2): p. 214-221.
91. Usifoh, S.F., et al., *Impact of lassa fever on the practice and consumption of stored food by university of Benin community, in Benin city, Nigeria*. Journal of Community Medicine and Primary Health Care, 2018. **30**(1): p. 66-76.
92. Usifoh, S.F., et al., *Lassa Fever-associated Stigmatization among Staff and Students of the University of Benin, Nigeria*. Journal of epidemiology and global health, 2019. **9**(2): p. 107-115.
93. Vieth, S., et al., *RT-PCR assay for detection of Lassa virus and related Old World arenaviruses targeting the L gene*. Transactions of the Royal Society of Tropical Medicine and Hygiene, 2007. **101**(12): p. 1253-1264.
94. White, H.A., *Lassa fever A study of 23 hospital cases*. Transactions of the Royal Society of Tropical Medicine and Hygiene, 1972. **66**(3): p. 390-398.
95. Whitmer, S.L.M., et al., *New Lineage of Lassa Virus, Togo, 2016*. Emerging infectious diseases, 2018. **24**(3): p. 599-602.
96. Wiley, M.R., et al., *Lassa virus circulating in Liberia: a retrospective genomic characterisation*. The Lancet Infectious Diseases, 2019. **19**(12): p. 1371-1378.
97. Wolff, S., et al., *Genome sequence of Lassa virus isolated from the first domestically acquired case in Germany*. Genome Announcements, 2016. **4**(5).
