# Supplementary material for: Systematic review and meta-analysis of the epidemiology of Lassa virus in humans, rodents and other mammals in sub-Saharan Africa
Source: PLOS journal article supplement (doi:10.1371/journal.pntd.0008589), 2020-08-26

S6 Fig: Funnel plot for publication for Lassa virus prevalence in others mammals

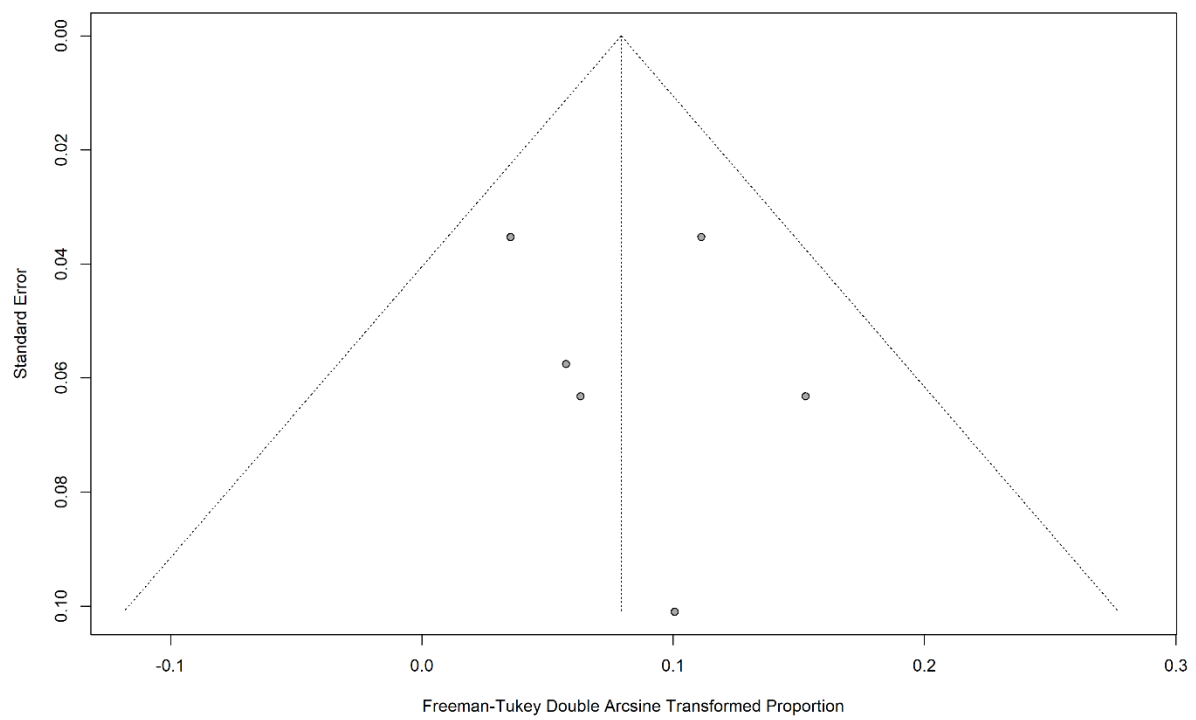

Supplement: S15 (10.1371/journal.pntd.0008589.s015) [file journal.pntd.0008589.s015]
